# Supplementary material for: Influence of solution pH on degradation of atrazine during UV and UV/H2O2 oxidation: kinetics, mechanism, and degradation pathways
Source: Royal Society of Chemistry journal article supplement (doi:10.1039/c9ra05747a), 2019-01-01
Supplement: c9ra05747a1.pdf [file c9ra05747a1.pdf]

## **Supporting Information**

### **Influence of solution pH on degradation of atrazine during UV and UV/H<sub>2</sub>O<sub>2</sub> oxidation: Kinetics, mechanism, and degradation pathways**

Yucan Liu<sup>a\*</sup>, Kai Zhu<sup>b\*</sup>, Miaomiao Su<sup>a</sup>, Huayu Zhu<sup>c</sup>, Jianbo Lu<sup>a</sup>, Yuxia Wang<sup>d</sup>, Jinkun Dong<sup>a</sup>,

Hao Qin<sup>a</sup>, Ying Wang<sup>a</sup> and Yan Zhang<sup>a</sup>

<sup>a</sup>School of Civil Engineering, Yantai University, Yantai 264005, China.

<sup>b</sup>College of resources and environment, Linyi University, Linyi 276000, China.

<sup>c</sup>School of chemistry & chemical engineering, Linyi University, Linyi 276000, China.

<sup>d</sup>School of Environmental and Municipal Engineering, North China University of Water Resources and Electric Power, Zhengzhou, 450046, China

#### **Corresponding author:**

Yucan Liu Ph.D.

School of Civil Engineering, Yantai University

30 Qingquan Road, Yantai, 264005, China

E-mail: liuyucan@ytu.edu.cn

Tel: +86 0535 6902606

Fax: +86 0535 6902606

Mobile: +86 15853588482

Kai Zhu Ph.D.

College of resources and environment, Linyi University

Shuangling Road, Linyi, 276000, China

E-mail: zhukai@lyu.edu.cn

## Contents

|                                                                                                                                                                                                         |    |
|---------------------------------------------------------------------------------------------------------------------------------------------------------------------------------------------------------|----|
| <b>Text S1</b> Parameters of UPLC and MS for identifying UV photo-oxidation products.....                                                                                                               | 4  |
| <b>Fig. S1</b> Emission spectrum of the low-pressure mercury UV lamp. ....                                                                                                                              | 5  |
| <b>Fig. S2</b> Schematic diagram of photochemical reactor. ....                                                                                                                                         | 6  |
| <b>Fig. S3</b> Distribution for protonated and deprotonated ATZ species as a function of solution pH. ....                                                                                              | 7  |
| <b>Fig. S4</b> The EIC of photo-degradation intermediates of ATZ in solution during sole-UV treatment.....                                                                                              | 8  |
| <b>Fig. S5</b> Molecular structure and MS/MS spectrum of P1 (ESI+, CE=22 eV).....                                                                                                                       | 9  |
| <b>Fig. S6</b> Molecular structure and MS/MS spectrum of P2 (ESI+, CE=22 eV).....                                                                                                                       | 10 |
| <b>Fig. S7</b> Molecular structure and MS/MS spectrum of P3 (ESI+, CE=0 eV).....                                                                                                                        | 11 |
| <b>Fig. S8</b> Molecular structure and MS/MS spectrum of P4 (ESI+ and ESI-, CE=23 eV).....                                                                                                              | 12 |
| <b>Fig. S9</b> Molecular structure and MS/MS spectrum of P5 (ESI+ and ESI-, CE=16 eV).....                                                                                                              | 13 |
| <b>Fig. S10</b> Molecular structure and MS/MS spectrum of P6 (ESI+ and ESI-, CE=24 eV).....                                                                                                             | 14 |
| <b>Fig. S11</b> Molecular structure and MS/MS spectrum of P7 (ESI+, CE=26 eV).....                                                                                                                      | 15 |
| <b>Fig. S12</b> Molecular structure and MS/MS spectrum of P8 (ESI+, CE=22 eV).....                                                                                                                      | 16 |
| <b>Fig. S13</b> Molecular structure and MS/MS spectrum of P9 (ESI+, CE=22 eV).....                                                                                                                      | 17 |
| <b>Fig. S14</b> Molecular structure and MS/MS spectrum of P10 (ESI+, CE=12 eV).....                                                                                                                     | 18 |
| <b>Fig. S15</b> UV-vis absorbance spectra of ATZ and its products in aqueous solutions at different pH values during sole-UV process. ....                                                              | 19 |
| <b>Fig. S16</b> UV-vis absorbance spectra of ATZ and its products in aqueous solutions at pH of 7.0 during UV/H <sub>2</sub> O <sub>2</sub> process.....                                                | 20 |
| <b>Fig. S17</b> Degradation of H <sub>2</sub> O <sub>2</sub> in UV/H <sub>2</sub> O <sub>2</sub> process and the dark controls at pH of 7.0.....                                                        | 21 |
| <b>Fig. S18</b> Effect of H <sub>2</sub> O <sub>2</sub> does and irradiation time on degradation of ATZ (5 mg L <sup>-1</sup> ) in aqueous solution at pH of 4.0 during UV irradiation treatment. ....  | 22 |
| <b>Fig. S19</b> Effect of H <sub>2</sub> O <sub>2</sub> does and irradiation time on degradation of ATZ (5 mg L <sup>-1</sup> ) in aqueous solution at pH of 10.0 during UV irradiation treatment. .... | 23 |

|                                                                                                                                                                                                                        |    |
|------------------------------------------------------------------------------------------------------------------------------------------------------------------------------------------------------------------------|----|
| <b>Fig. S20</b> UV-vis absorbance spectra of ATZ and its products in aqueous solutions at pH of 4.0 during UV/H <sub>2</sub> O <sub>2</sub> process.....                                                               | 24 |
| <b>Fig. S21</b> UV-vis absorbance spectra of ATZ and its products in aqueous solutions at pH of 10.0 during UV/H <sub>2</sub> O <sub>2</sub> process.....                                                              | 25 |
| <b>Fig. S22</b> Degradation of H <sub>2</sub> O <sub>2</sub> in UV/H <sub>2</sub> O <sub>2</sub> process and the dark controls at pH of 4.0.....                                                                       | 26 |
| <b>Fig. S23</b> Degradation of H <sub>2</sub> O <sub>2</sub> in UV/H <sub>2</sub> O <sub>2</sub> process and the dark controls at pH of 10.0.....                                                                      | 27 |
| <b>Fig. S24</b> The EIC of photo-degradation intermediates of ATZ in aqueous solution at 90 min of UV irradiation in UV/H <sub>2</sub> O <sub>2</sub> process under different H <sub>2</sub> O <sub>2</sub> dose. .... | 28 |
| <b>Fig. S25</b> Molecular structure and MS/MS spectrum of P12 (ESI+, CE=20 eV).....                                                                                                                                    | 29 |
| <b>Fig. S26</b> Molecular structure and MS/MS spectrum of P13 (ESI+, CE=15 eV).....                                                                                                                                    | 30 |
| <b>Fig. S27</b> Molecular structure and MS/MS spectrum of P14 (ESI+ and ESI-, CE=20 eV).....                                                                                                                           | 31 |
| <b>Fig. S28</b> Molecular structure and MS/MS spectrum of P15 (ESI+ and ESI-, CE=20 eV).....                                                                                                                           | 32 |
| <b>Fig. S29</b> Molecular structure and MS/MS spectrum of P16 (ESI+, CE=15 eV).....                                                                                                                                    | 33 |
| <b>Fig. S30</b> Molecular structure and MS/MS spectrum of P17 (ESI+, CE=18 eV).....                                                                                                                                    | 34 |
| <b>Fig. S31</b> Molecular structure and MS/MS spectrum of P18 (ESI+, CE=17 eV).....                                                                                                                                    | 35 |
| <b>Fig. S32</b> Molecular structure and MS/MS spectrum of P16 (ESI+, CE=15 eV).....                                                                                                                                    | 36 |
| <b>Fig. S33</b> Molecular structure and MS/MS spectrum of P20 (ESI+ and ESI-, CE=20 eV).....                                                                                                                           | 37 |
| <b>Fig. S34</b> Molecular structure and MS/MS spectrum of P21 (ESI+ and ESI-, CE=20 eV).....                                                                                                                           | 38 |
| <b>Table S1</b> Pseudo-first-order reaction rate constants ( $k_{obs}$ ) of ATZ at different pH values in sole-UV process.....                                                                                         | 39 |
| <b>Table S2</b> Retention time (RT) and MS spectral information in full scan modes of ATZ and its intermediates. ....                                                                                                  | 40 |
| <b>Table S3</b> Pseudo-first-order reaction rate constants ( $k_{obs}$ ) of ATZ (initial pH of 7.0) at different H <sub>2</sub> O <sub>2</sub> does in UV/H <sub>2</sub> O <sub>2</sub> process. ....                  | 41 |
| <b>Table S4</b> Retention time (RT) and MS spectral information in full scan modes of ATZ and its intermediates. ....                                                                                                  | 42 |

**Text S1** Parameters of UPLC and MS for identifying UV photo-oxidation products.

The binary mobile phase was composed of methanol (mobile phase A) and ultrapure water (mobile phase B), and the flow rate was 0.2 mL min<sup>-1</sup>. The elution started with 10% A for 3 minutes, the concentration of A was increased to 70% within 18 minutes, and then the concentration of A was increased to 100% within 22 minutes and retained for 3 minutes, finally it was dropped back to 10% and run for 3 minutes for equilibrium before the next injection. A total acquisition time of one run analysis was 28 min. The column temperature was maintained at 35 °C and the injection volume was 10 µL. The source temperature and desolvation temperature were 110 °C and 350 °C, the capillary voltage was 3.3 kV, and the cone voltage was 35 V. Desolvation gas (nitrogen gas) and cone gas (nitrogen gas) flows were set at 500 L h<sup>-1</sup> and 30 L h<sup>-1</sup>, respectively. Full scan data were acquired from *m/z* 50 to 300 at an acquisition rate of 0.2 sec scan<sup>-1</sup> in both positive electrospray ionization (ESI+) mode and negative electrospray ionization (ESI-) mode. In order to obtain further information for analyzing the structure of intermediates, collision induced dissociation (CID) experiments in daughter scan were also conducted. Argon was used as collision gas in daughter scan model and its flow rate was at 0.12 mL min<sup>-1</sup>. The collision energy for each product was optimized in the range from 15 to 35 eV.

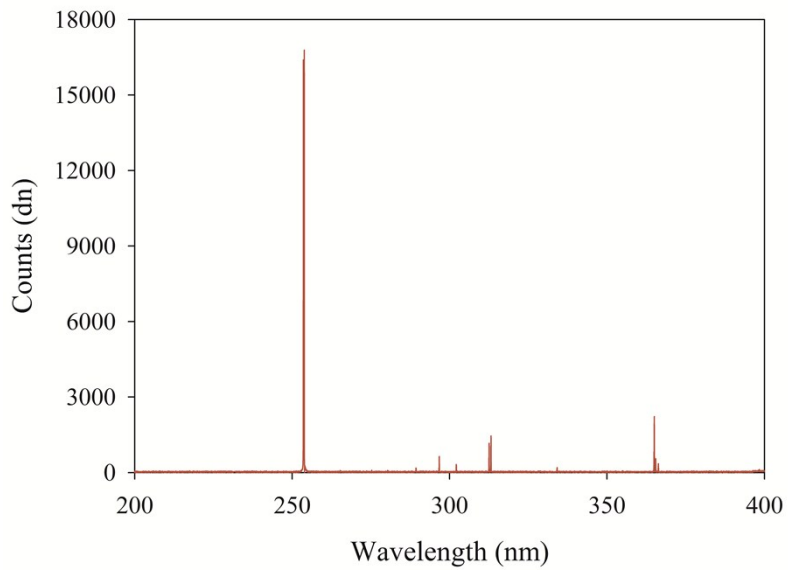

**Fig. S1** Emission spectrum of the low-pressure mercury UV lamp.

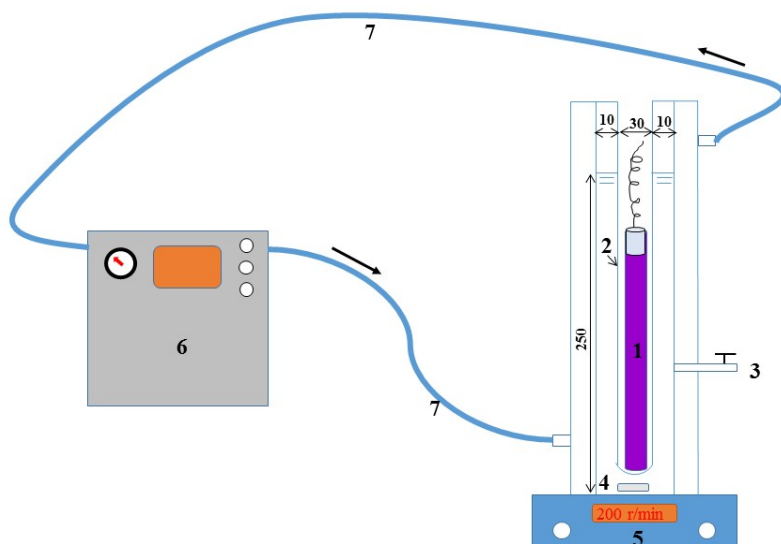

**Fig. S2** Schematic diagram of photochemical reactor.

(1) low-pressure mercury UV lamp; (2) quartz glass well; (3) sampling point; (4) magnetic stirrer; (5) magnetic stirrer apparatus; (6) thermostatic water recirculation system; (7) silicone tube. All dimensions are in millimeter (mm).

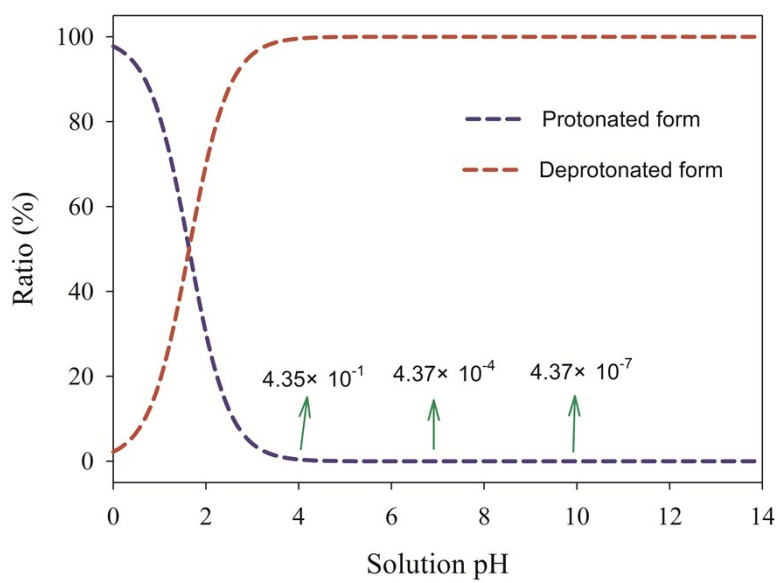

**Fig. S3** Distribution for protonated and deprotonated ATZ species as a function of solution pH.

$$C_{\text{Total}} = C_{\text{Deprotonated form}} + C_{\text{Protonated}}$$

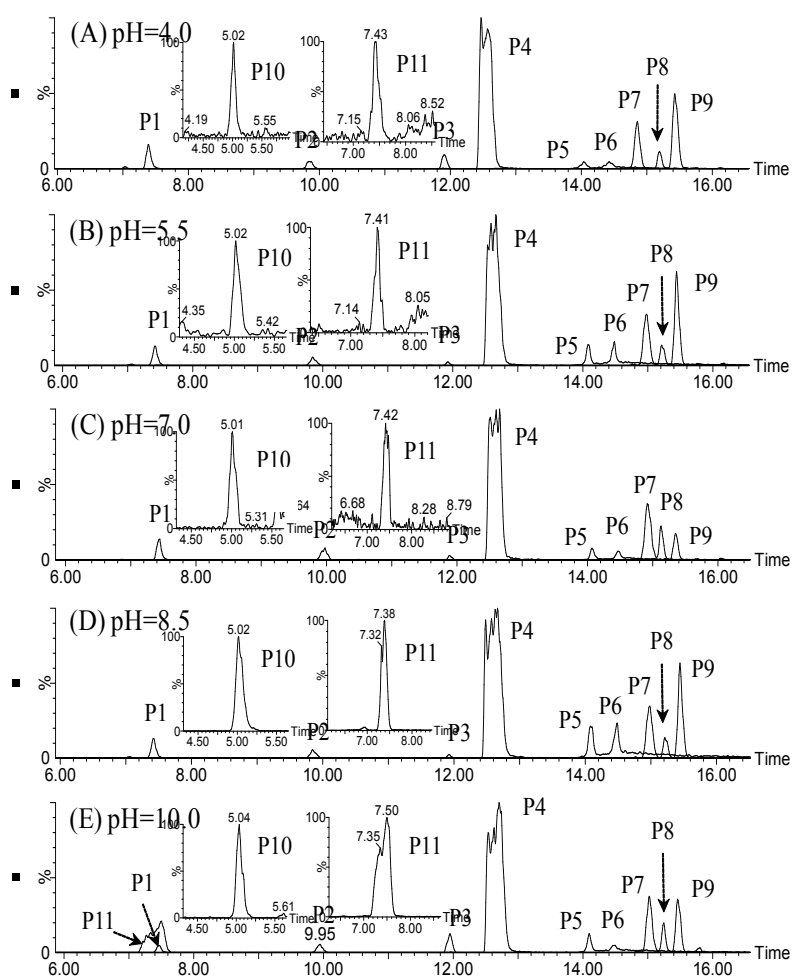

**Fig. S4** The EIC of photo-degradation intermediates of ATZ in solution during sole-UV treatment. Raw ATZ solution:  $5 \text{ mg L}^{-1}$ ; irradiation time: 120 min. (A) pH 4.0; (B) pH 5.5; (C) pH 7.0; (D) pH 8.5; (E) pH 10.0.



**P1 (4-Isopropylamino-6-amino-s-triazine)**

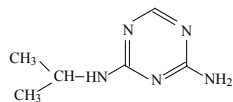

ESI+ mode

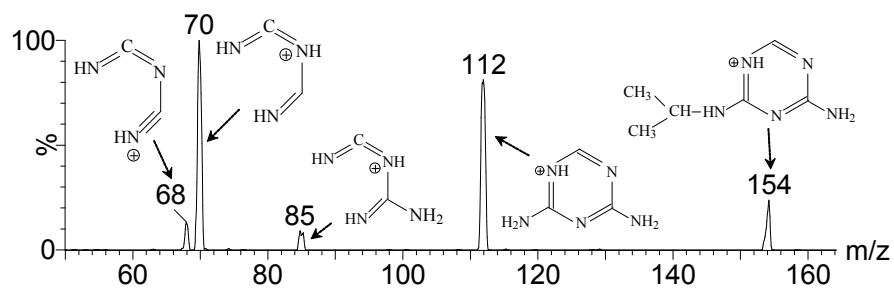

**Fig. S5** Molecular structure and MS/MS spectrum of P1 (ESI+, CE=22 eV).

**P2 (2-Methoxy-4-methylamino-6-isopropylamino-s-triazine)**

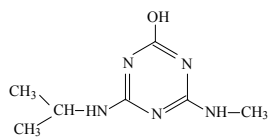

ESI+ mode

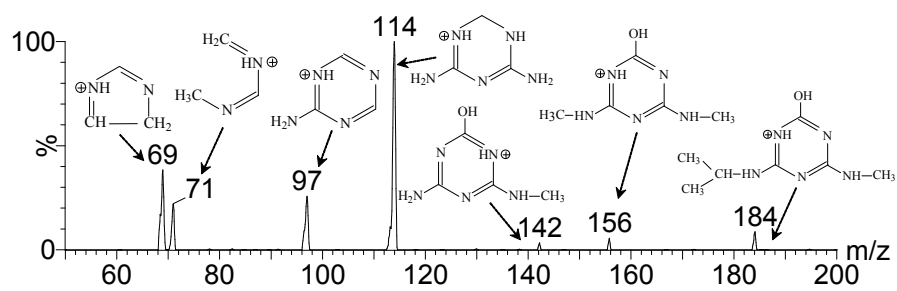

**Fig. S6** Molecular structure and MS/MS spectrum of P2 (ESI+, CE=22 eV).

**P3 (2-Hydroxy-4-isopropylamino-6-vinylamino-s-triazine)**

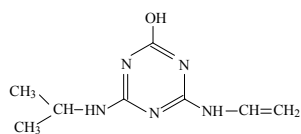

ESI+ mode

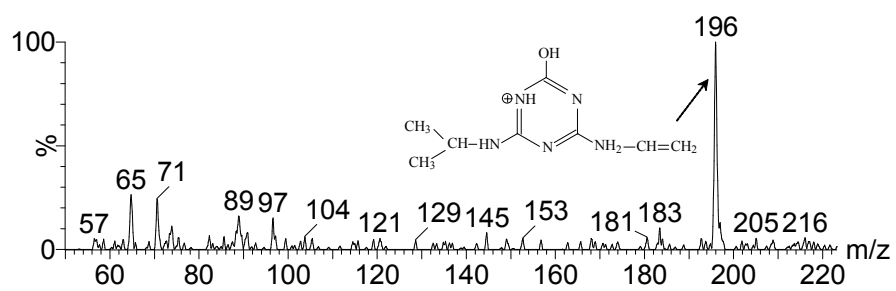

**Fig. S7** Molecular structure and MS/MS spectrum of P3 (ESI+, CE=0 eV).

**P4 (2-Hydroxy-4-ethylamino-6-isopropylamines-s-triazine)**

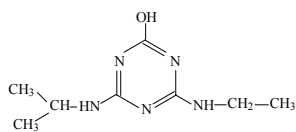

ESI+ mode

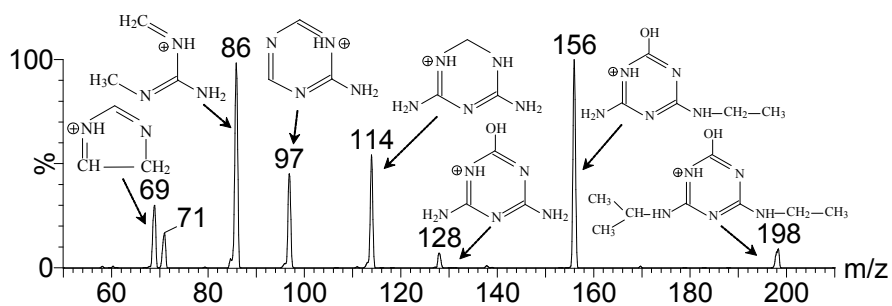

ESI- mode

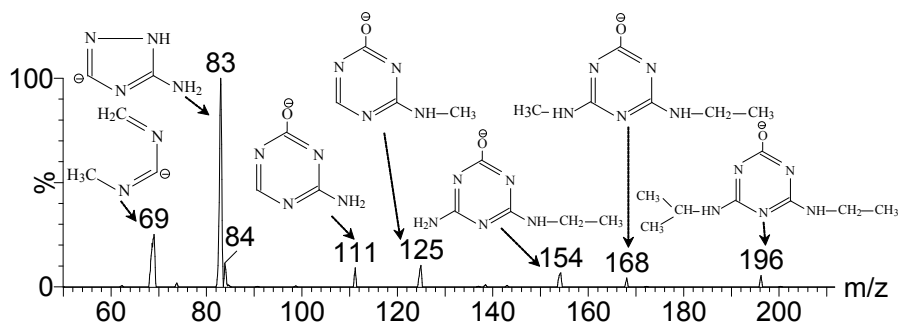

**Fig. S8** Molecular structure and MS/MS spectrum of P4 (ESI+ and ESI-, CE=23 eV).

**P5 (2-Hydroxy-4-acetamido-6-ethylamino-s-triazine)**

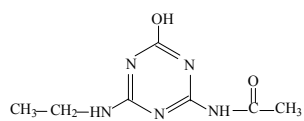

ESI+ mode

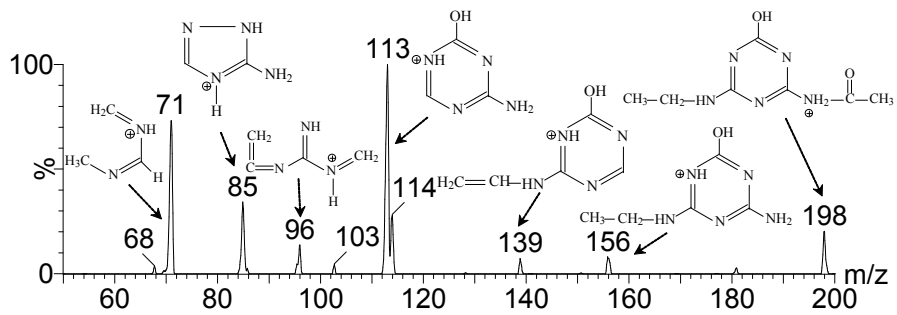

ESI- mode

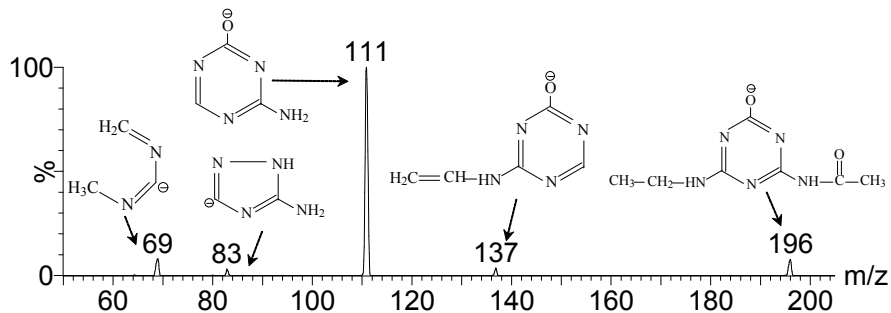

**Fig. S9** Molecular structure and MS/MS spectrum of P5 (ESI+ and ESI-, CE=16 eV).

**P6 (2-Hydroxy-4-(2-hydroxy-ethylamino)-6-vinylamino-s-triazine)**

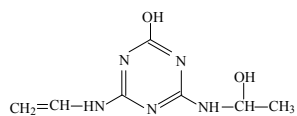

ESI+ mode

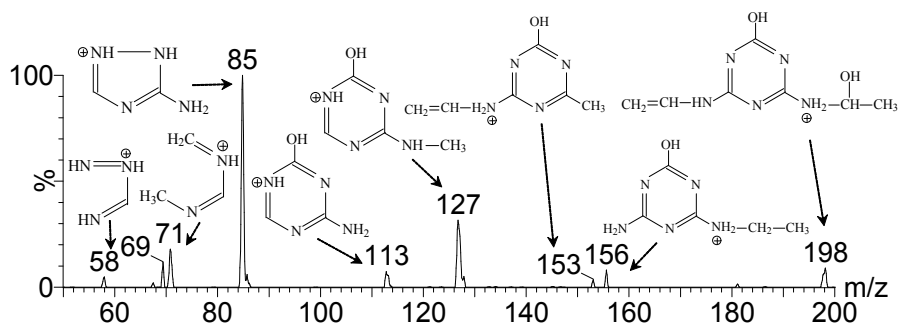

ESI- mode

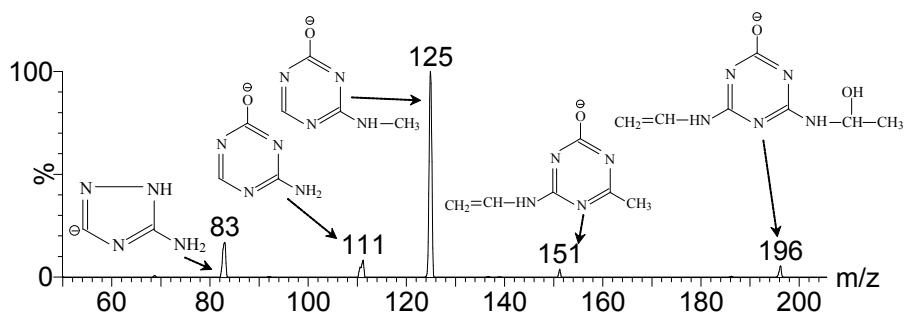

**Fig. S10** Molecular structure and MS/MS spectrum of P6 (ESI+ and ESI-, CE=24 eV).

**P7 (2-Hydroxy-4-acetamido-6-isopropylamino-s-triazine)**

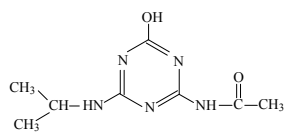

ESI+ mode

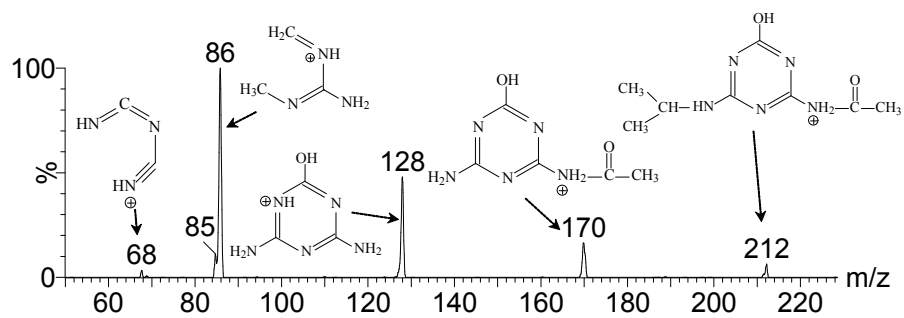

**Fig. S11** Molecular structure and MS/MS spectrum of P7 (ESI+, CE=26 eV).

**P8 (2-Methoxy-4-isopropylamino-6-ethylamino-s-triazine)**

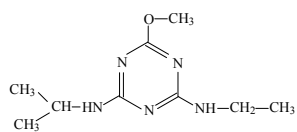

ESI+ mode

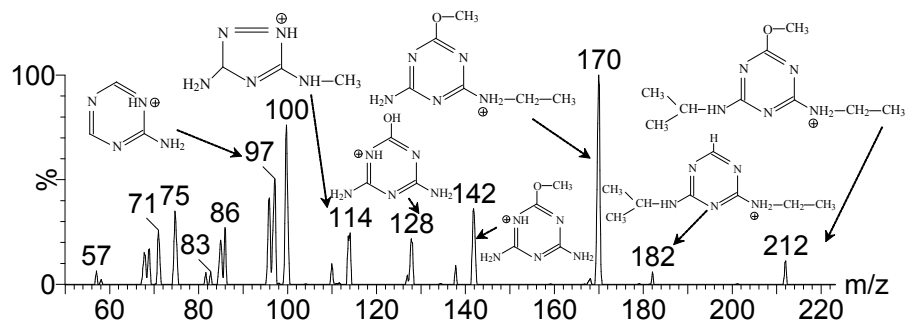

**Fig. S12** Molecular structure and MS/MS spectrum of P8 (ESI+, CE=22 eV).



**P9 (2-Chloro-4-ethylamino-6-isopropylamino-s-triazine)**

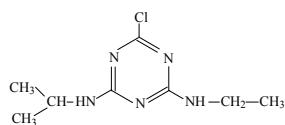

ESI+ mode

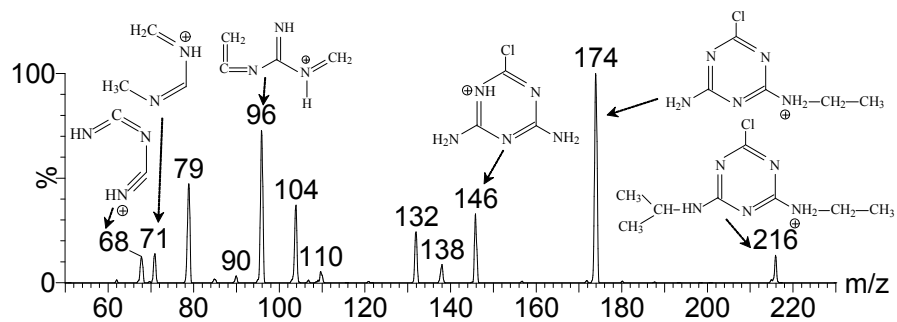

**Fig. S13** Molecular structure and MS/MS spectrum of P9 (ESI+, CE=22 eV).

**P10 (2-Hydroxy-4-vinylamino-s-triazine)**

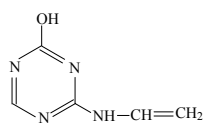

ESI+ mode

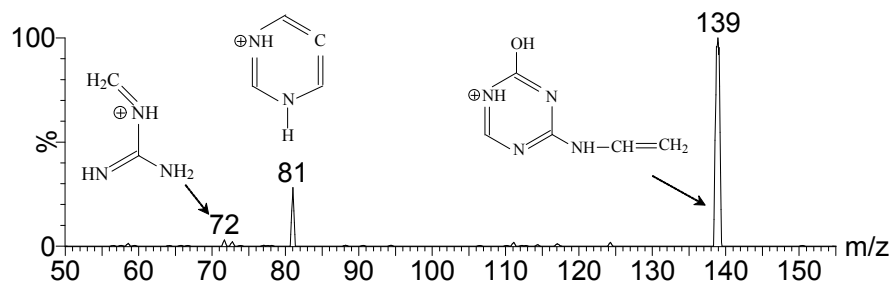

**Fig. S14** Molecular structure and MS/MS spectrum of P10 (ESI+, CE=12 eV).

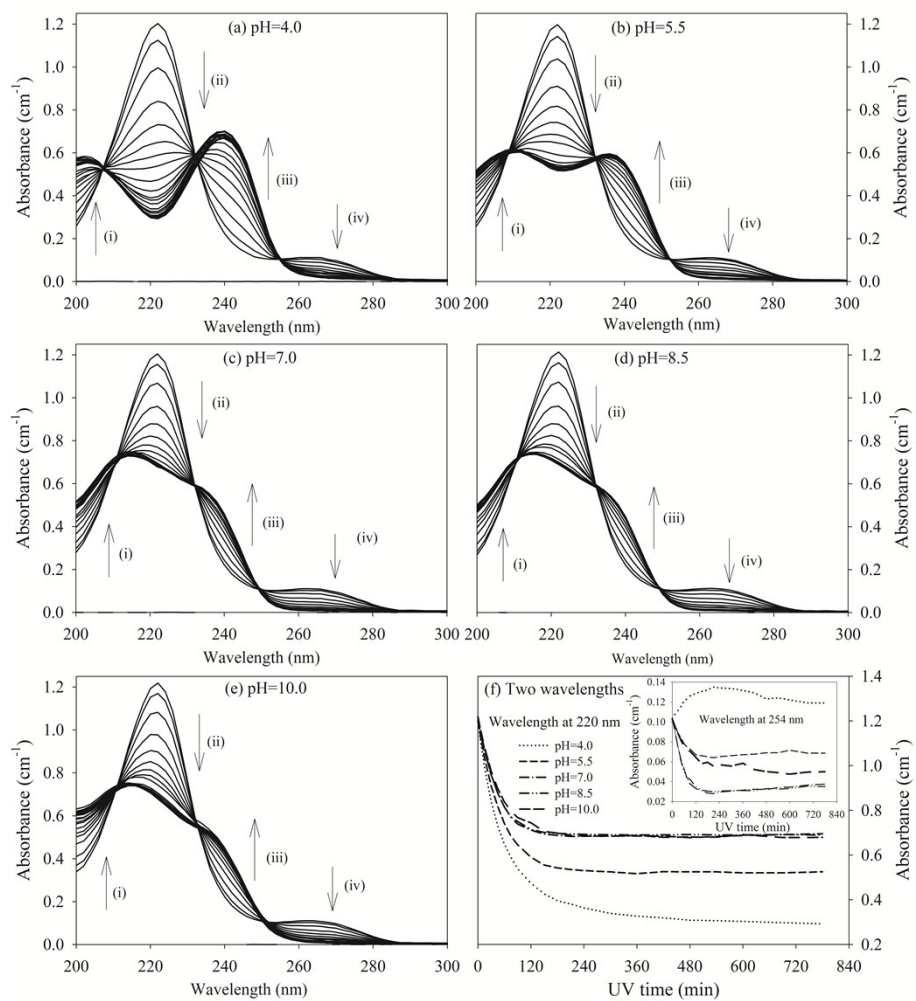

**Fig. S15** UV-vis absorbance spectra of ATZ and its products in aqueous solutions at different pH values during sole-UV process.

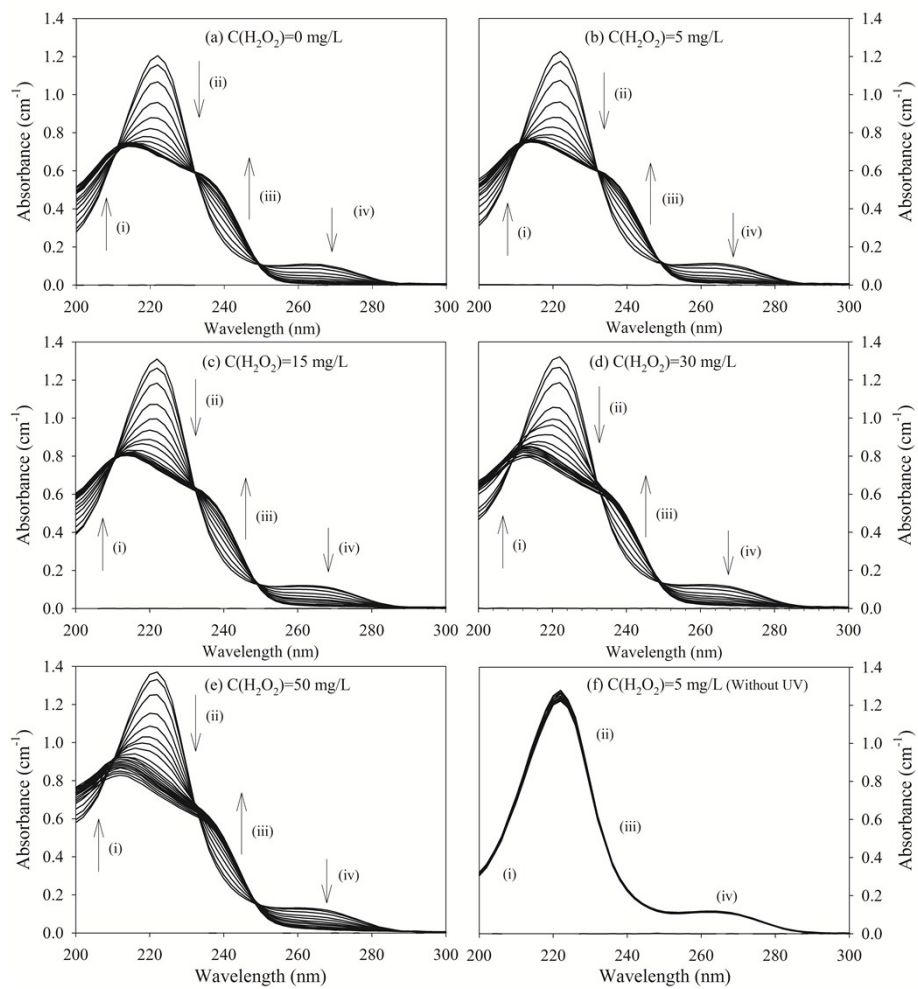

**Fig. S16** UV-vis absorbance spectra of ATZ and its products in aqueous solutions at pH of 7.0 during UV/H<sub>2</sub>O<sub>2</sub> process.

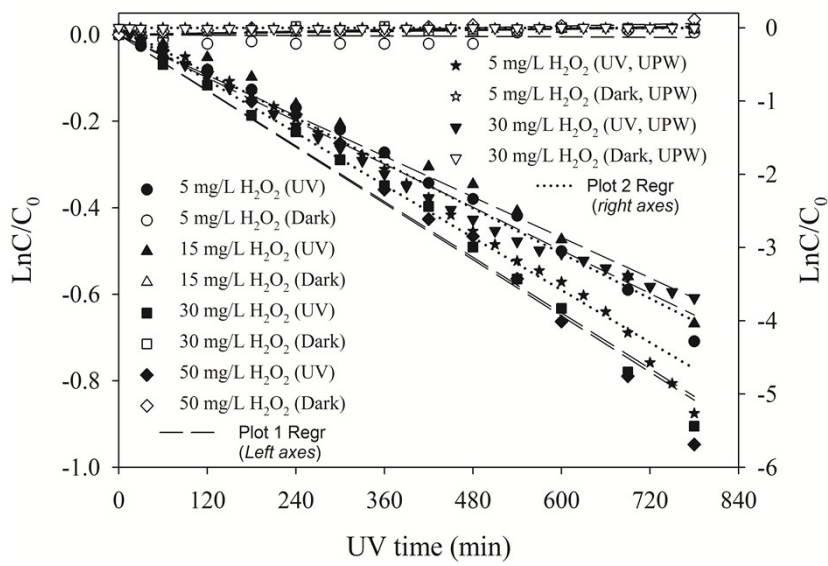

**Fig. S17** Degradation of  $H_2O_2$  in UV/ $H_2O_2$  process and the dark controls at pH of 7.0.

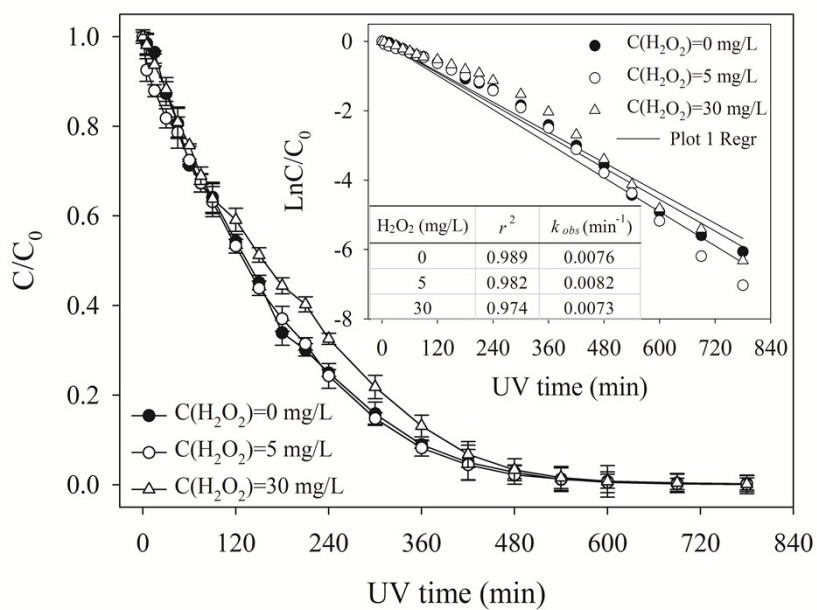

**Fig. S18** Effect of H<sub>2</sub>O<sub>2</sub> does and irradiation time on degradation of ATZ (5 mg L<sup>-1</sup>) in aqueous solution at pH of 4.0 during UV irradiation treatment.

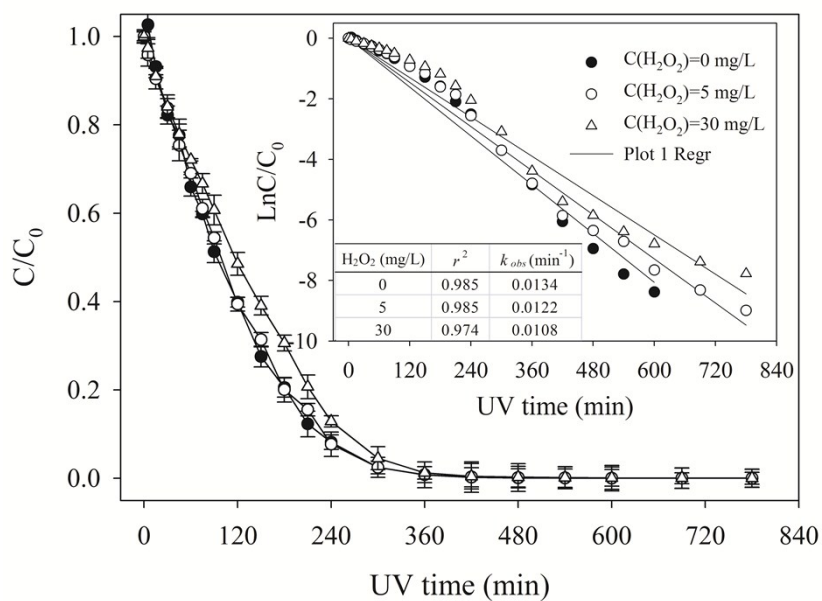

**Fig. S19** Effect of H<sub>2</sub>O<sub>2</sub> does and irradiation time on degradation of ATZ (5 mg L<sup>-1</sup>) in aqueous solution at pH of 10.0 during UV irradiation treatment.

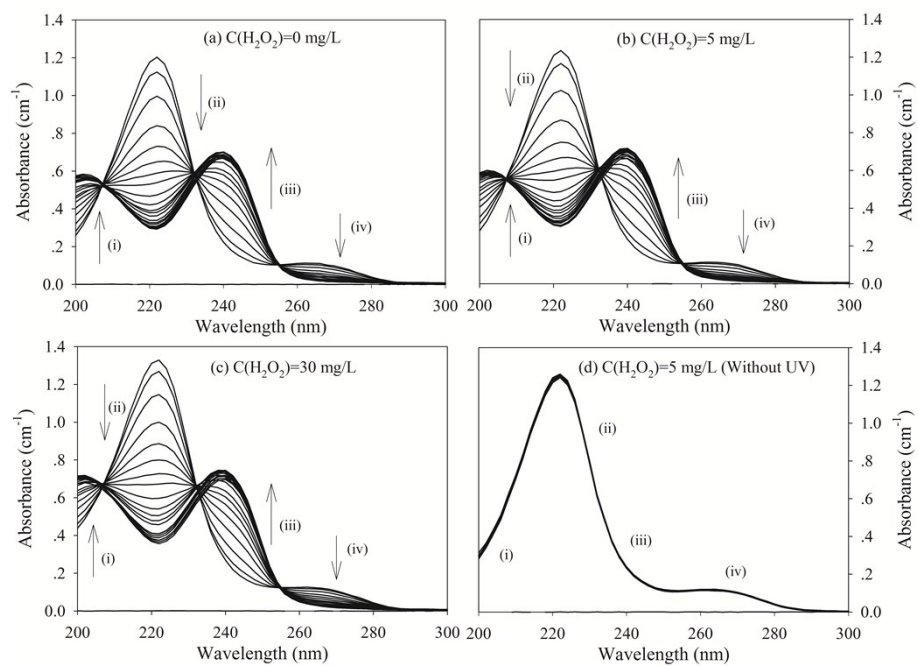

**Fig. S20** UV-vis absorbance spectra of ATZ and its products in aqueous solutions at pH of 4.0 during UV/H<sub>2</sub>O<sub>2</sub> process.



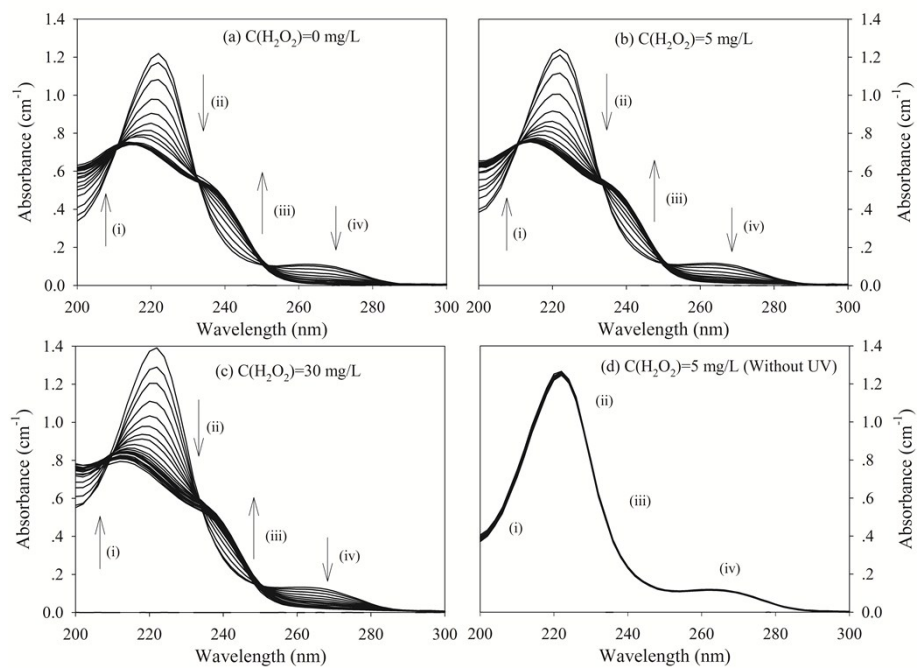

**Fig. S21** UV-vis absorbance spectra of ATZ and its products in aqueous solutions at pH of 10.0 during UV/H<sub>2</sub>O<sub>2</sub> process.

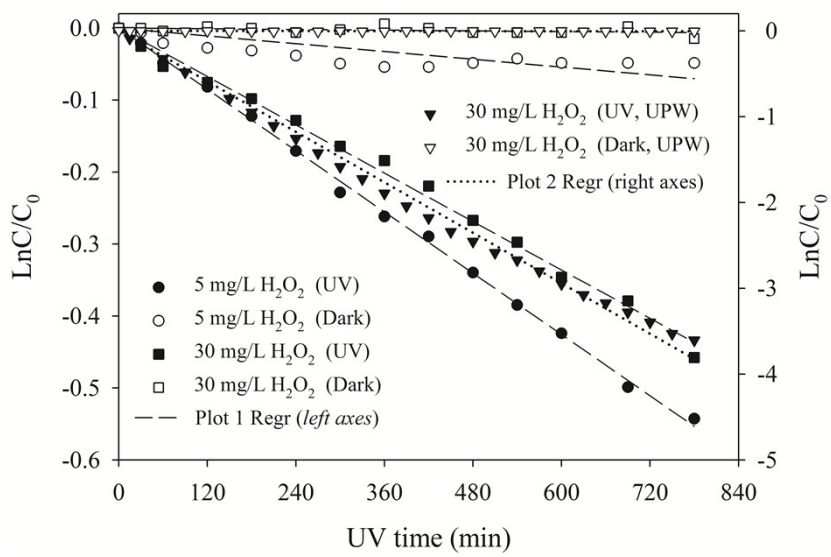

**Fig. S22** Degradation of H<sub>2</sub>O<sub>2</sub> in UV/H<sub>2</sub>O<sub>2</sub> process and the dark controls at pH of 4.0.

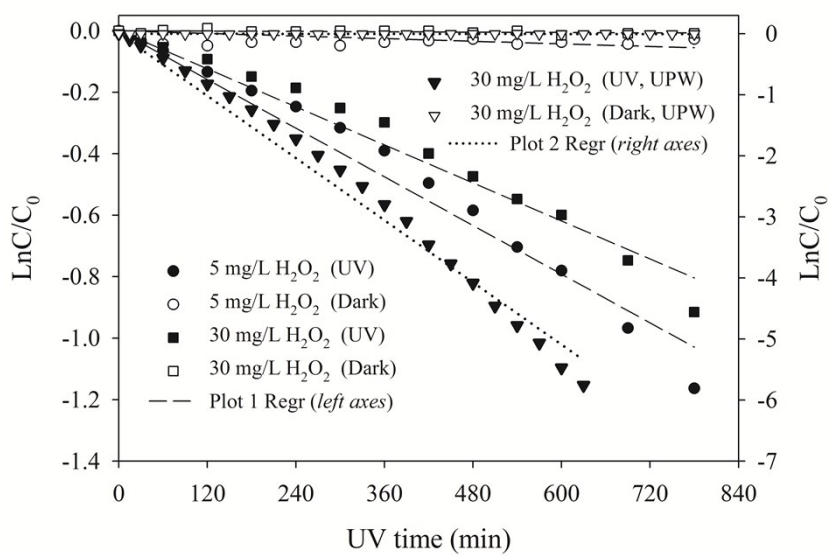

**Fig. S23** Degradation of  $H_2O_2$  in UV/ $H_2O_2$  process and the dark controls at pH of 10.0.

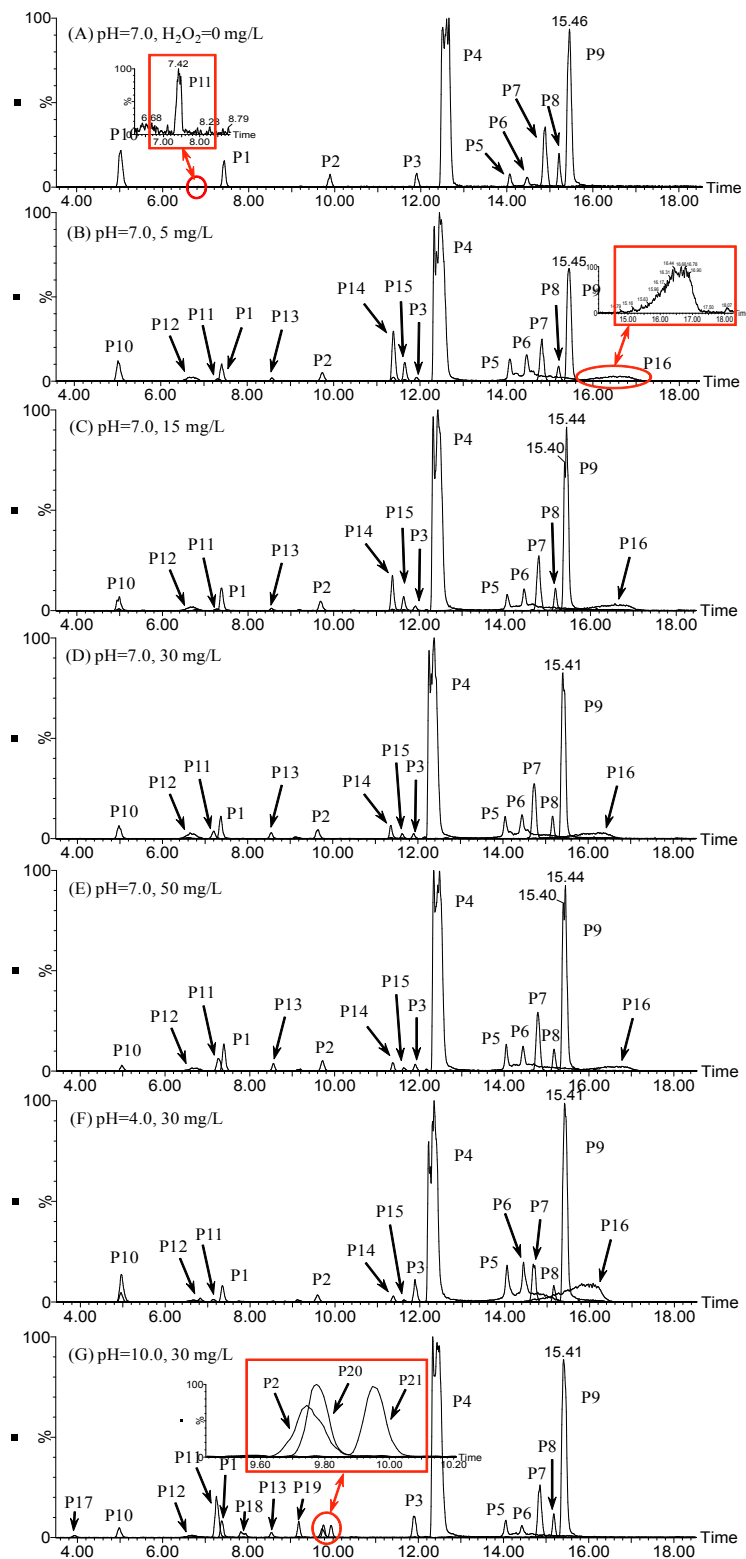

**Fig. S24** The EIC of photo-degradation intermediates of ATZ in aqueous solution at 90 min of UV irradiation in UV/H<sub>2</sub>O<sub>2</sub> process under different H<sub>2</sub>O<sub>2</sub> dose.

(A) pH=7.0, 0 mg L<sup>-1</sup> H<sub>2</sub>O<sub>2</sub>; (B) pH=7.0, 5 mg L<sup>-1</sup> H<sub>2</sub>O<sub>2</sub>; (C) pH=7.0, 15 mg L<sup>-1</sup> H<sub>2</sub>O<sub>2</sub>; (D) pH=7.0, 30 mg L<sup>-1</sup> H<sub>2</sub>O<sub>2</sub>; (E) pH=7.0, 50 mg L<sup>-1</sup> H<sub>2</sub>O<sub>2</sub>; (F) pH=4.0, 30 mg L<sup>-1</sup> H<sub>2</sub>O<sub>2</sub>; (G) pH=10.0, 30 mg L<sup>-1</sup> H<sub>2</sub>O<sub>2</sub>.

**P12** (2-Hydroxy-4-acetamido-6-isopropenylamino-*s*-triazine)

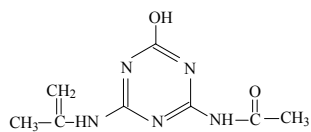

ESI+ mode

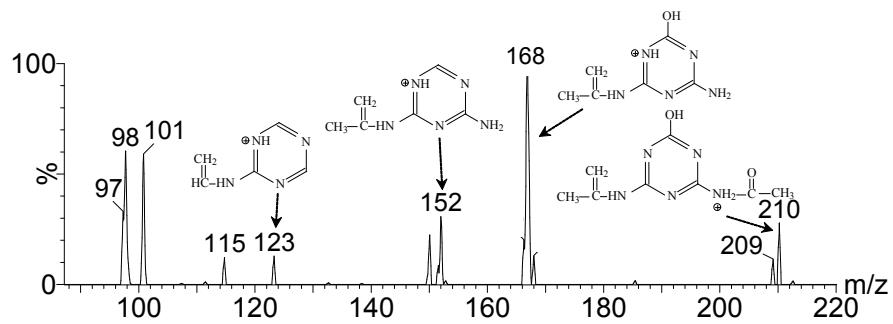

**Fig. S25** Molecular structure and MS/MS spectrum of P12 (ESI+, CE=20 eV).

**P13 (4-acetamido-s-triazine)**

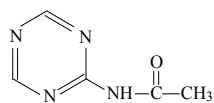

ESI+ mode

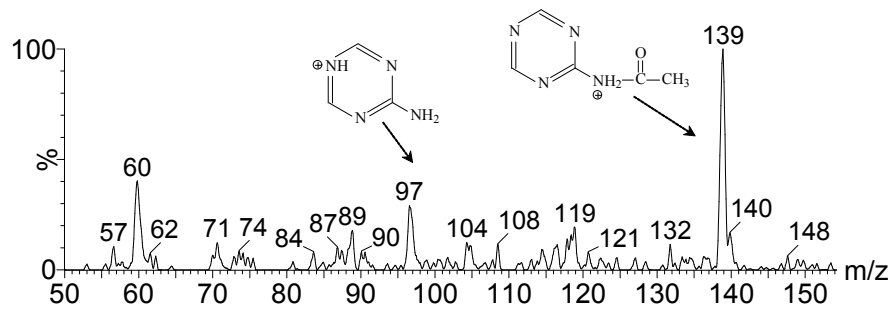

**Fig. S26** Molecular structure and MS/MS spectrum of P13 (ESI+, CE=15 eV).

**P14 (2-Hydroxy-4-acetamido-6-(2-hydroxyisopropylamino)-s-triazine)**

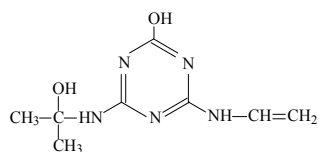

ESI+ mode

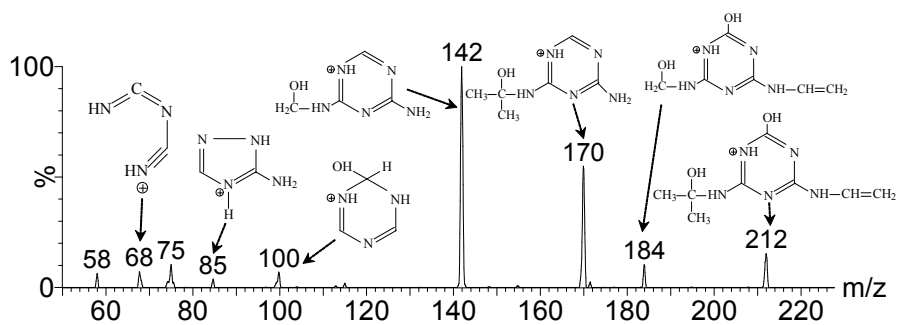

ESI- mode

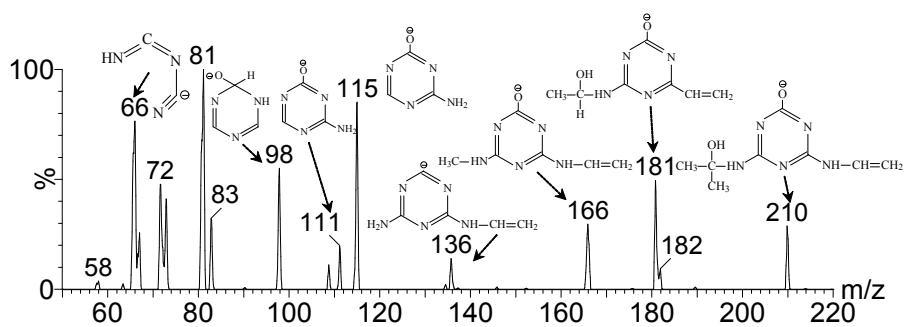

**Fig. S27** Molecular structure and MS/MS spectrum of P14 (ESI+ and ESI-, CE=20 eV).

**P15 (2-Hydroxy-4-ethylimine-6-(2-hydroxyisopropylamino)-s-triazine)**

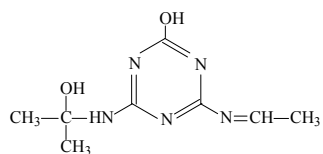

ESI+ mode

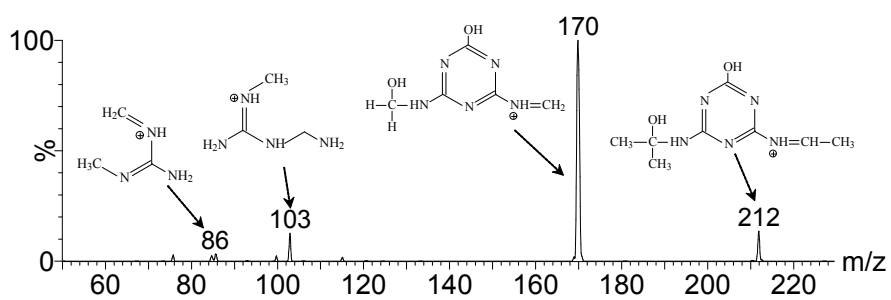

ESI- mode

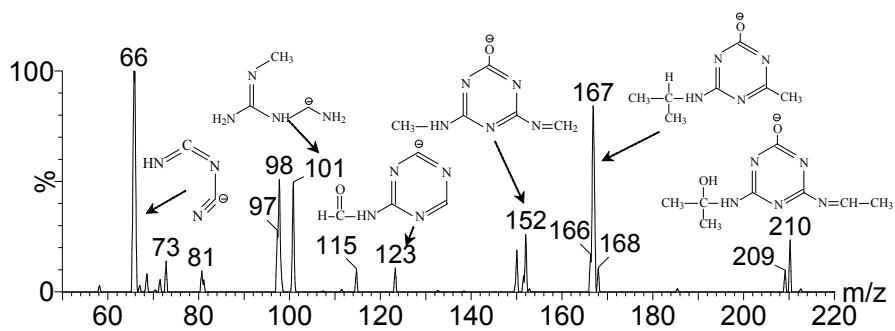

**Fig. S28** Molecular structure and MS/MS spectrum of P15 (ESI+ and ESI-, CE=20 eV).



**P16** (2-Chloro-4-vinylamino-6-acetamido-s-triazine)

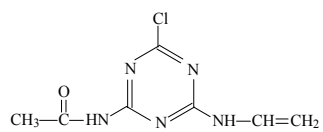

ESI+ mode

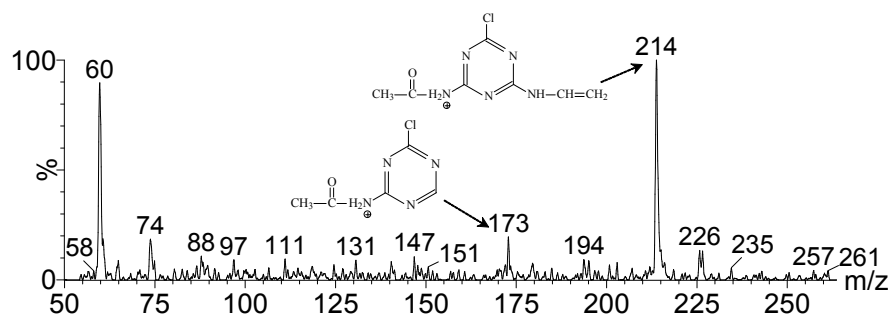

**Fig. S29** Molecular structure and MS/MS spectrum of P16 (ESI+, CE=15 eV).

**P17** (2-Hydroxy-4-(2-hydroxy-ethylamino)-6-isopropylamino-s-triazine)

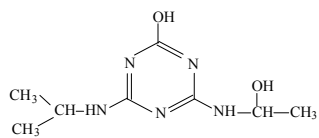

ESI+ mode

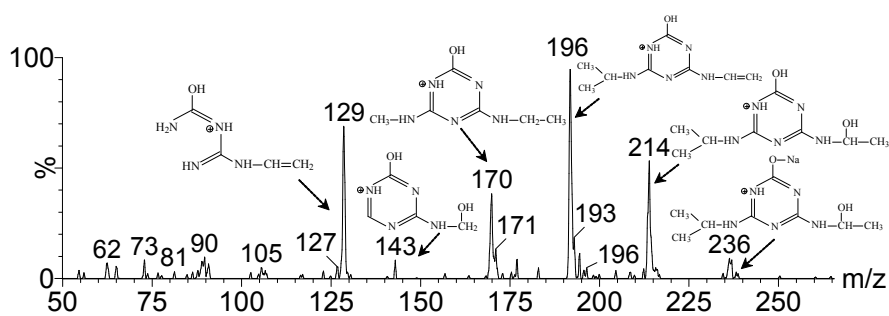

**Fig. S30** Molecular structure and MS/MS spectrum of P17 (ESI+, CE=18 eV).

**P18** (2-Hydroxy-4-ethylamino-6-(2-hydroxyisopropylamino)-s-triazine)

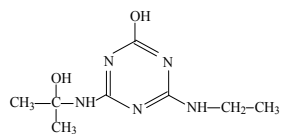

ESI+ mode

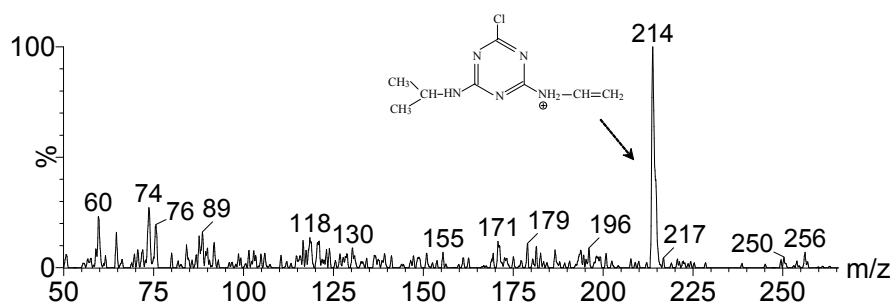

**Fig. S31** Molecular structure and MS/MS spectrum of P18 (ESI+, CE=17 eV).

**P19** (2-Hydroxy-4-ethylamino-6-isopropenylamino-s-triazine)

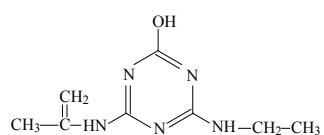

ESI+ mode

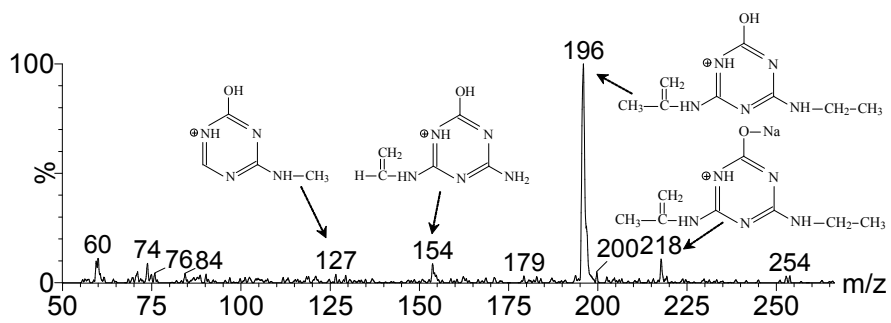

**Fig. S32** Molecular structure and MS/MS spectrum of P16 (ESI+, CE=15 eV).

**P20 (2-Hydroxy-4-(2-hydroxy-ethylamino)-6-amino-s-triazine)**

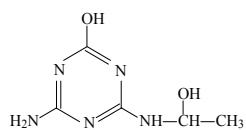

ESI+ mode

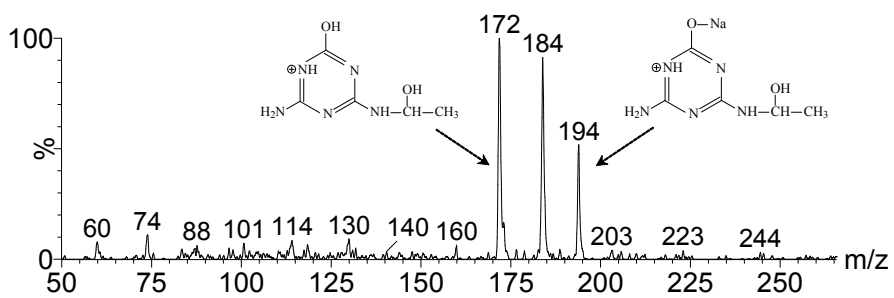

ESI- mode

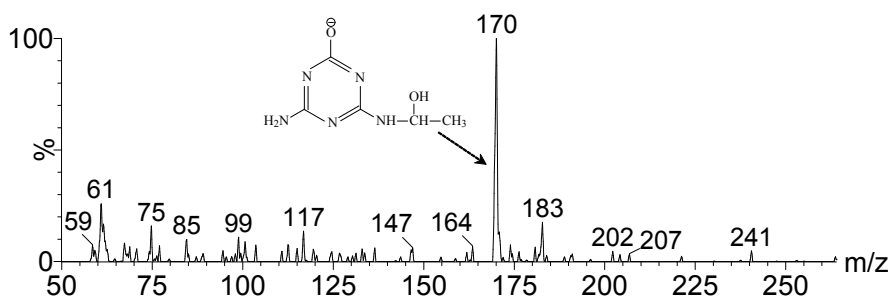

**Fig. S33** Molecular structure and MS/MS spectrum of P20 (ESI+ and ESI-, CE=20 eV).

**P21 (2-Chloro-4-vinylamino-6-amino-s-triazine)**

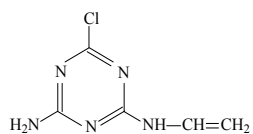

ESI+ mode

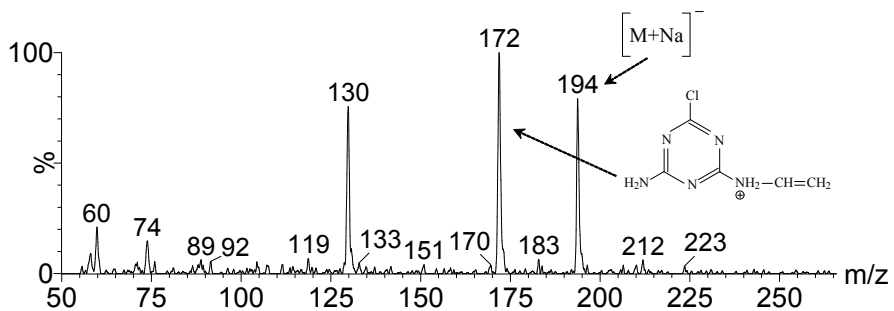

ESI- mode

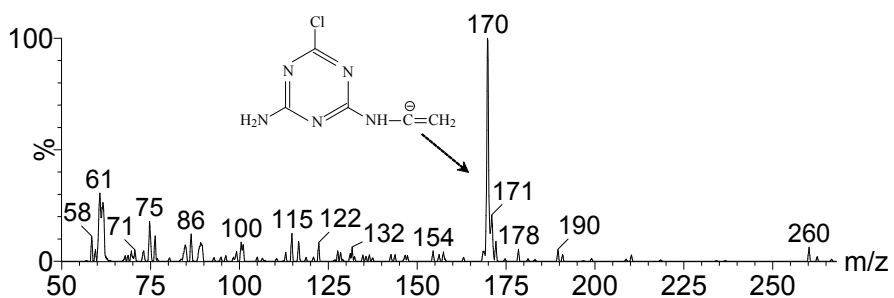

**Fig. S34** Molecular structure and MS/MS spectrum of P21 (ESI+ and ESI-, CE=20 eV).

**Table S1** Pseudo-first-order reaction rate constants ( $k_{obs}$ ) of ATZ at different pH values in sole-UV process.

| Initial solution<br>pH values | Final solution<br>pH values | Linear correlation<br>coefficient ( $r^2$ ) | Reaction rate<br>constants $k_{obs}$ (min <sup>-1</sup> )<br>1) | Half-life time<br>$t_{1/2}$ (min) |
|-------------------------------|-----------------------------|---------------------------------------------|-----------------------------------------------------------------|-----------------------------------|
| 4.0                           | 4.03                        | 0.989                                       | 0.0076                                                          | 91.2                              |
| 5.5                           | 5.51                        | 0.986                                       | 0.0113                                                          | 61.3                              |
| 7.0                           | 6.98                        | 0.987                                       | 0.0150                                                          | 46.2                              |
| 8.5                           | 8.46                        | 0.989                                       | 0.0140                                                          | 49.5                              |
| 10.0                          | 9.95                        | 0.985                                       | 0.0134                                                          | 51.7                              |

**Note:** initial ATZ concentration: 5 mg L<sup>-1</sup>.

**Table S2** Retention time (RT) and MS spectral information in full scan modes of ATZ and its intermediates.

| Name | RT/min | MS spectral (ESI+)                                                                  | MS spectral (ESI-)                                                                   |
|------|--------|-------------------------------------------------------------------------------------|--------------------------------------------------------------------------------------|
| P1   | 7.42   | 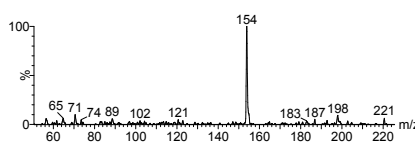   |                                                                                      |
| P2   | 9.89   |    |                                                                                      |
| P3   | 11.90  |    |                                                                                      |
| P4   | 12.60  |    |    |
| P5   | 14.06  |   |   |
| P6   | 14.46  |  |  |
| P7   | 14.88  |  |  |
| P8   | 15.20  |  |                                                                                      |
| P9   | 15.44  |  |  |
| P10  | 5.02   |  |                                                                                      |
| P11  | 7.54   |  |  |



**Table S3** Pseudo-first-order reaction rate constants ( $k_{obs}$ ) of ATZ (initial pH of 7.0) at different H<sub>2</sub>O<sub>2</sub> does in UV/H<sub>2</sub>O<sub>2</sub> process.

| Initial H <sub>2</sub> O <sub>2</sub> concentration | Final solution pH values | Linear correlation coefficient ( $r^2$ ) | Reaction rate constants $k_{obs}$ (min <sup>-1</sup> ) | Half-life time $t_{1/2}$ (min) |
|-----------------------------------------------------|--------------------------|------------------------------------------|--------------------------------------------------------|--------------------------------|
| 0                                                   | 6.98                     | 0.983                                    | 0.0145                                                 | 46.2                           |
| 5                                                   | 6.95                     | 0.979                                    | 0.0165                                                 | 42.0                           |
| 15                                                  | 6.88                     | 0.988                                    | 0.0118                                                 | 58.7                           |
| 30                                                  | 6.82                     | 0.991                                    | 0.0108                                                 | 64.2                           |
| 50                                                  | 6.68                     | 0.995                                    | 0.0097                                                 | 71.5                           |

**Table S4** Retention time (RT) and MS spectral information in full scan modes of ATZ and its intermediates.

| Name | RT/min | MS spectral (ESI+)                                                                  | MS spectral (ESI-)                                                                   |
|------|--------|-------------------------------------------------------------------------------------|--------------------------------------------------------------------------------------|
| P12  | 6.70   | 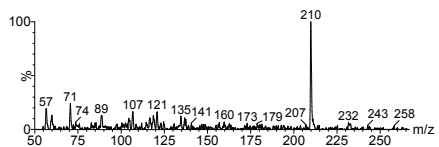   |                                                                                      |
| P13  | 8.58   |    |                                                                                      |
| P14  | 11.38  |    |    |
| P15  | 11.64  |    |    |
| P16  | 16.60  |  |                                                                                      |
| P17  | 3.92   |  |                                                                                      |
| P18  | 7.90   |  |                                                                                      |
| P19  | 9.20   |  |                                                                                      |
| P20  | 9.77   |  |  |
| P21  | 9.95   |  |  |
